# Supplementary material for: SecA2 Associates with Translating Ribosomes and Contributes to the Secretion of Potent IFN-β Inducing RNAs
Source: MDPI journal article supplement (doi:10.3390/ijms232315021), 2022-11-30
Supplement: s1 [file s1]

## Supplementary Material

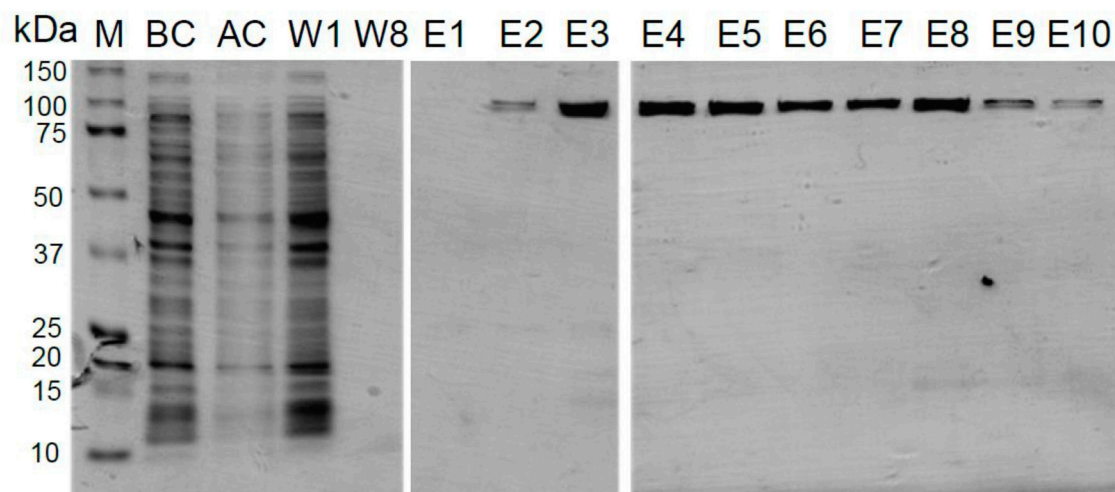

**Figure S1.** Affinity chromatography for SecA2. Protein patterns of cytosolic fractions before (before column, BC) and after (after column, AC) pass through the streptactin affinity chromatography column. Coomassie gel of wash fractions (the first W1 and the eighth W8) and the elution fractions (E1 to E10) are depicted.

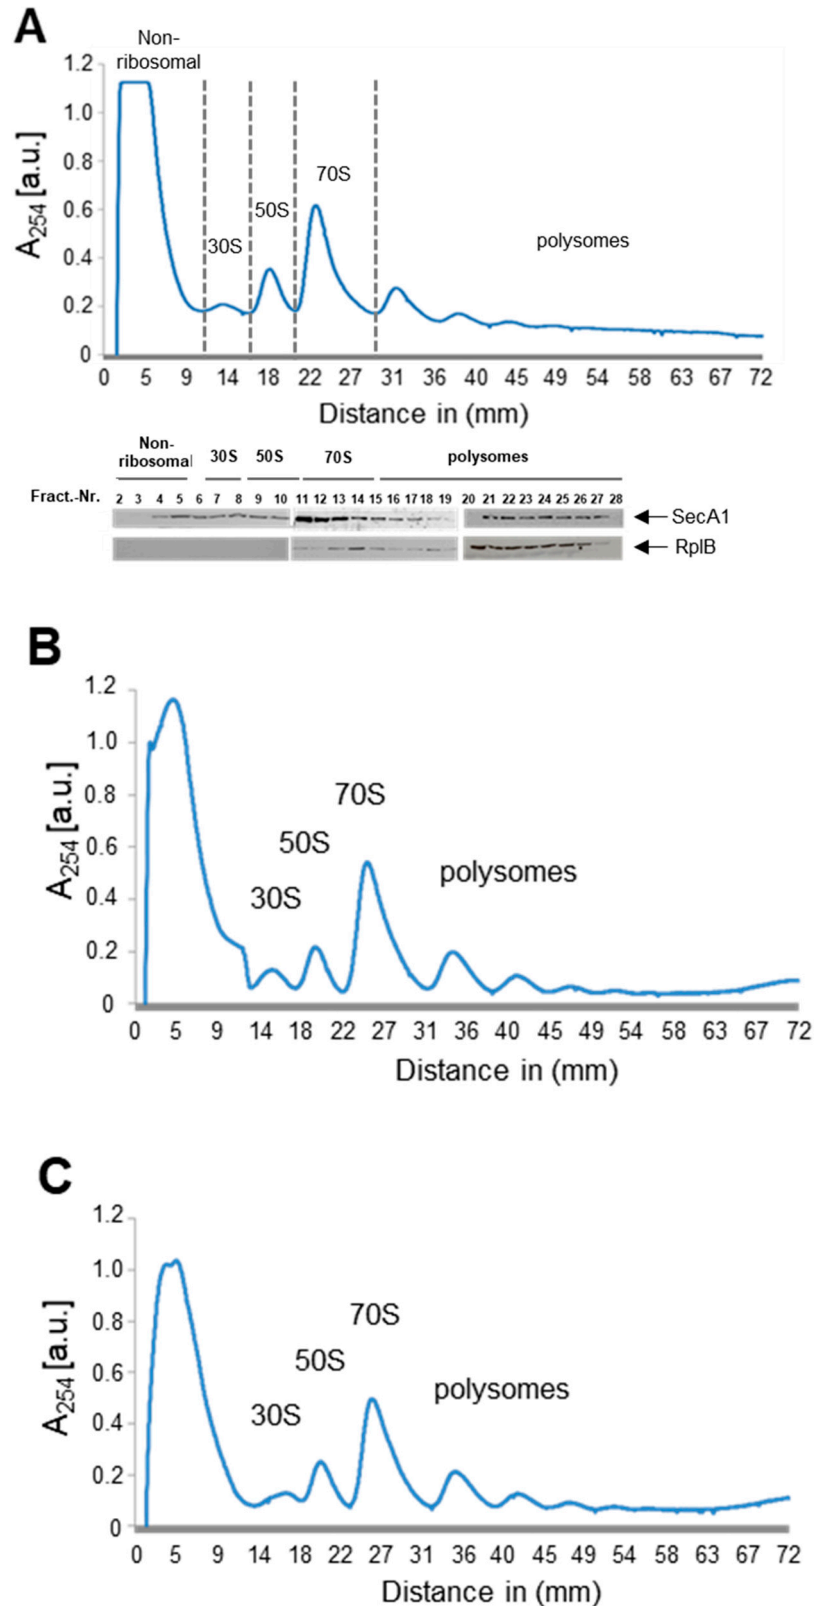

**Figure S2.** Ribosome profiles of recombinant SecA1 expressing strain Lm-SecA1 (A), wild type strain (B) and *L. monocytogenes* harboring the empty pERL-3 vector (C). Ribosomal peaks were normalized to the same gradient baseline by subtracting the area under the polysome profile for quantitative comparison.

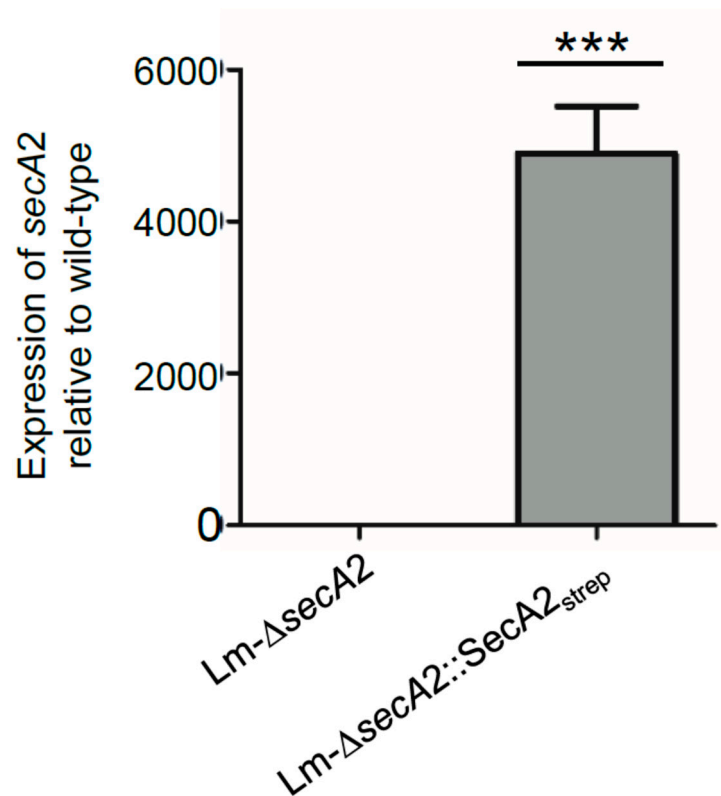

**Figure S3.** Expression of *secA2* in Lm-Δ*secA2* and the complemented strain Lm-Δ*secA2*::SecA2<sub>strep</sub> as compared to wild-type. The transcript amounts were determined by using qRT-PCR. Specific *secA2* primers are listed in table S1.

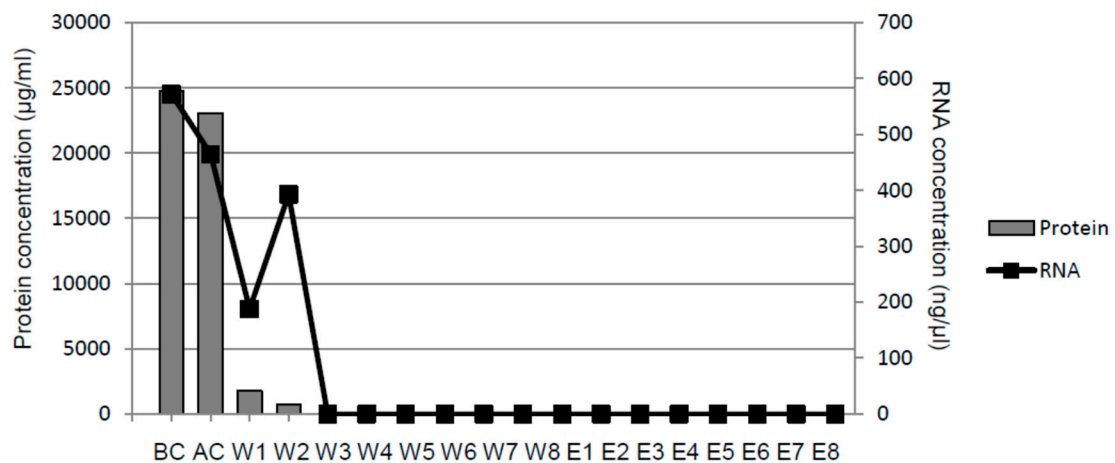

**Figure S4.** Affinity chromatography of lysates from *L. monocytogenes* wild type strain without affinity-tagged protein expressing pERL-3 plasmid. Neither protein nor RNA were elutable.

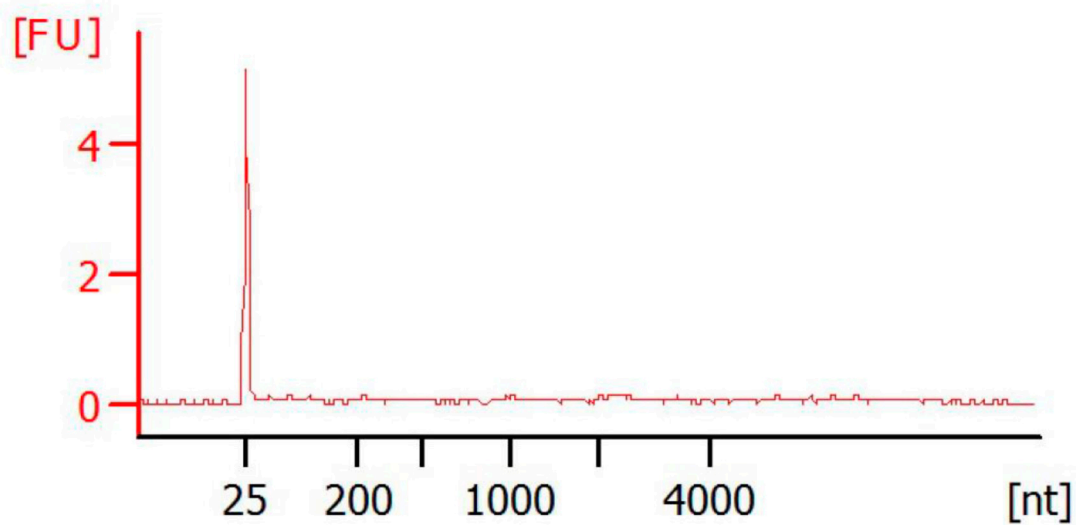

**Figure S5.** RNase I treatment SecA2- and SecA1-associated RNAs are completely digested.

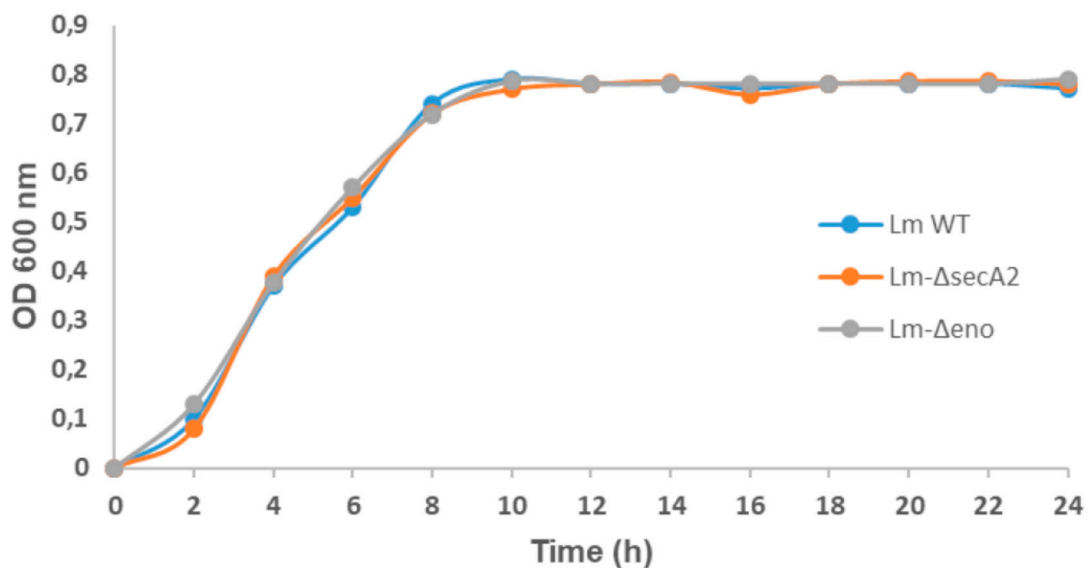

**Figure S6.** In-vitro growth of *L. monocytogenes* wild type (Lm WT), Lm-ΔsecA2 and Lm-Δeno at 37°C in BHI. Values represent one of three independent experiments.

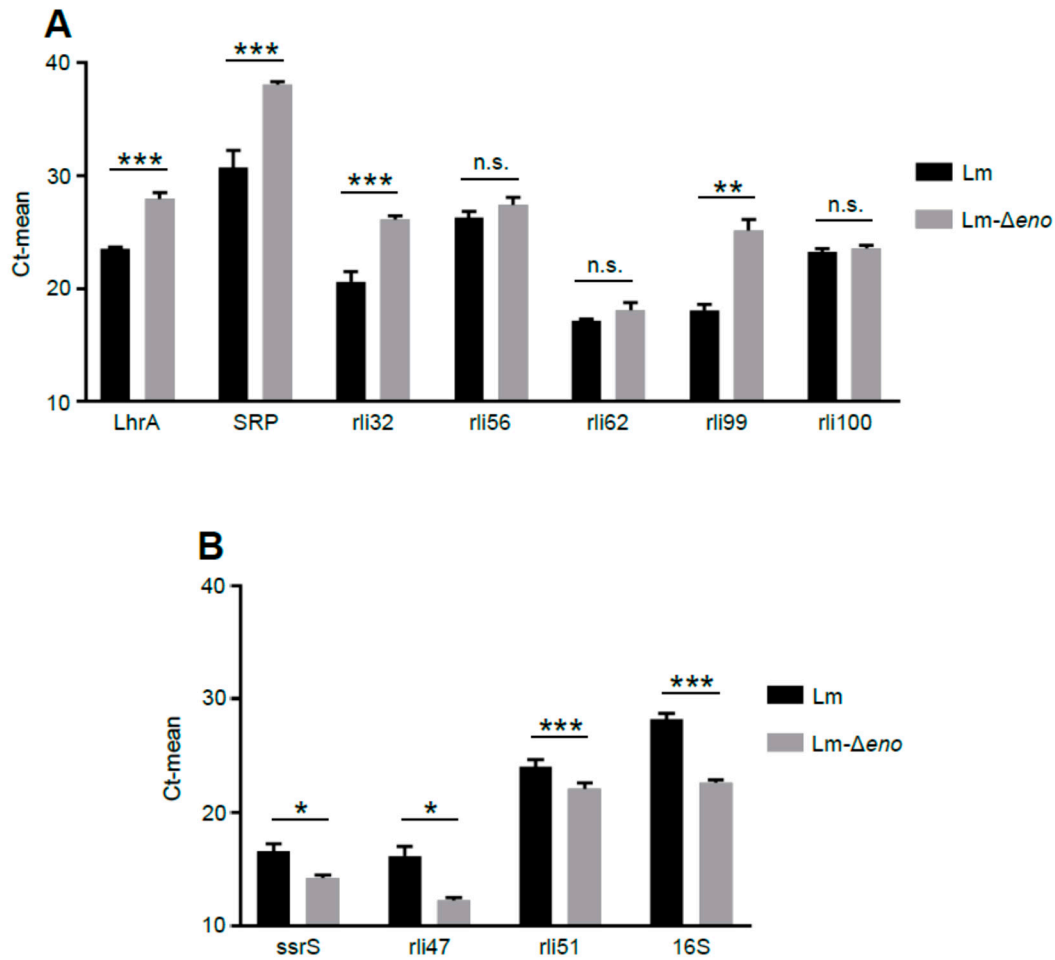

**Figure S7.** (A) Impact of enolase deletion on the transcript amounts of selected sRNAs in sec-RNA of Lm and Lm-Δeno. The amounts of the sRNAs rli32, LhrA, SRP and rli99 are decreased in Lm-Δeno, whereas the amounts of rli56, rli62, rli100 are unchanged. The transcript amounts in sec-RNA were determined by using qRT-PCR. The data represent the mean of three independent experiments (n.s. not significant). (B) sRNAs (ssrS, rli47, rli51 and 16S rRNA) whose amounts were found to be increased in the absence of enolase. Data are presented as means  $\pm$  SD of results from three experiments (ns, nonsignificant; \*  $P < 0.05$ , \*\*  $P < 0.01$ ; \*\*\*  $P < 0.001$ ).

**Table S1.** List of SecA2-dependent proteins according to Lenz et al. (2003) and Renier et al. (2014). Identified proteins that were co-isolated with SecA2 in this study are highlighted in blue.

| Lmo Nr. | Gene name | Protein name                                                                       |
|---------|-----------|------------------------------------------------------------------------------------|
| lmo0258 | rpoB      | RNA polymerase beta subunit                                                        |
| lmo0259 | rpoC      | DNA-directed RNA polymerase subunit beta'                                          |
| lmo0582 | p60       | Invasion associated protein (lap), Cell-wall hydrolase                             |
| lmo1054 | pdhC      | Dihydrolipoamide acyltransferase (E2)                                              |
| lmo1388 | tcsA      | CD4+ T-cell stimulating antigen                                                    |
| lmo1439 | sodA      | Superoxide dismutase                                                               |
| lmo1473 | dnaK      | Chaperone protein DnaK                                                             |
| lmo1634 | lap       | Bifunctional aldehyde/alcohol dehydrogenase; listerial adhesion protein            |
| lmo1829 | fbpA      | Fibronectin-binding protein A                                                      |
| lmo2039 | FtsI      | Cell division protein FtsI                                                         |
| lmo2068 | groEL     | 60 kDa chaperonin                                                                  |
| lmo2110 |           | Mannose-6-phosphate isomerase                                                      |
| lmo2125 |           | ABC-type maltose transporter                                                       |
| lmo2196 | oppA      | ABC-type oligopeptide transport system                                             |
| lmo2455 | eno       | Enolase                                                                            |
| lmo2526 | murA      | UDP-N-acetylglucosamine enolpyruvyl transferase                                    |
| lmo2596 | rpsI      | 30S ribosomal protein S9                                                           |
| lmo2637 | pplA      | Peptide pheromone-encoding lipoprotein A, NADH-(ubi-)-quinone oxireductase subunit |
| lmo2653 | tuf       | Elongation factor Tu                                                               |

**Table S2.** Primers used in this study (5'- to 3'-prime direction).

|                  |                                     |
|------------------|-------------------------------------|
| Phelp-for.       | gcgcgatctcgagatctgcaggat            |
| LT_StrepLink_rev | atagtccagctgctgcttttcaaattgtgg      |
| LT_SecStrep_for  | aaaagcagcagctggactattga             |
| LT_SecA_Term_rev | actttacaactatgcttctttac             |
| LT_SecA_Term_for | agaagcatagttgtaaaagtaataaaaaaattaag |
| Term.-rev.       | gcgccccggggcttatattatat             |
| Imo2455_1r       | aaaaagggtgaacgcttcgtg               |
| Imo2455_2f       | aatcaactta ttataattctctcttggtt      |
| Imo2455_3r       | agaattataa taagttgattgaataaaacg     |
| Imo2455_4f       | gcgcaccgtttatttcataag               |
| secA2 f          | cggcgctttaatgatggactccatc           |
| secA2 r          | gacggaattcttcttcctcag               |

**Table S3.** SecA2 associated sRNAs

| Name    | Chromosome  | Region                       | Expression value | Gene length | RPKM       | Unique gene reads | Total gene reads |
|---------|-------------|------------------------------|------------------|-------------|------------|-------------------|------------------|
| ssrA    | EGDe (NCBI) | complement(2509737..2510236) | 29485,6787       | 500         | 29485,6787 | 21876             | 21876            |
| SRP     | EGDe (NCBI) | complement(2784206..2784540) | 7930,21627       | 335         | 7930,21627 | 3942              | 3942             |
| ssrS    | EGDe (NCBI) | complement(1546330..1546537) | 1892,18123       | 208         | 1892,18123 | 584               | 584              |
| rli61   | EGDe (NCBI) | complement(2275258..2275362) | 2631,52667       | 105         | 2631,52667 | 410               | 410              |
| rli47   | EGDe (NCBI) | 2226036..2226349             | 862,798981       | 314         | 862,798981 | 402               | 402              |
| rli32   | EGDe (NCBI) | complement(600602..600751)   | 1010,89134       | 150         | 1010,89134 | 225               | 225              |
| rli33-1 | EGDe (NCBI) | 708309..708494               | 474,647907       | 186         | 474,647907 | 131               | 131              |
| rli31   | EGDe (NCBI) | 597806..597949               | 421,204726       | 144         | 421,204726 | 90                | 90               |
| rli90   | EGDe (NCBI) | complement(1527932..1528048) | 489,605494       | 117         | 489,605494 | 85                | 85               |
| rnxB    | EGDe (NCBI) | complement(1961656..1961974) | 147,883791       | 319         | 147,883791 | 70                | 70               |
| rli48   | EGDe (NCBI) | complement(2361297..2361404) | 380,644271       | 108         | 380,644271 | 61                | 61               |
| rli72   | EGDe (NCBI) | 200410..200519               | 238,937954       | 110         | 238,937954 | 39                | 39               |
| rli56   | EGDe (NCBI) | 1199848..1199937             | 292,035277       | 90          | 292,035277 | 39                | 39               |
| LhrA    | EGDe (NCBI) | complement(2346167..2346434) | 95,5568932       | 268         | 95,5568932 | 38                | 38               |
| rli50   | EGDe (NCBI) | complement(2782959..2783264) | 70,4760849       | 306         | 70,4760849 | 31                | 32               |
| sbrA    | EGDe (NCBI) | 1399365..1399464             | 175,221166       | 100         | 175,221166 | 26                | 26               |
| rli88   | EGDe (NCBI) | 1320429..1320509             | 183,042054       | 81          | 183,042054 | 22                | 22               |
| rli97   | EGDe (NCBI) | complement(2280060..2280111) | 272,163054       | 52          | 272,163054 | 21                | 21               |
| rli114  | EGDe (NCBI) | complement(2857244..2857320) | 175,04612        | 77          | 175,04612  | 20                | 20               |
| rli111  | EGDe (NCBI) | 2736465..2736564             | 121,306961       | 100         | 121,306961 | 18                | 18               |
| rli86   | EGDe (NCBI) | 1272592..1272662             | 142,379062       | 71          | 142,379062 | 15                | 15               |
| rli28   | EGDe (NCBI) | complement(507068..507402)   | 32,1875851       | 335         | 32,1875851 | 14                | 16               |
| rli112  | EGDe (NCBI) | 2782958..2783091             | 70,4103423       | 134         | 70,4103423 | 14                | 14               |
| rli91   | EGDe (NCBI) | complement(1575830..1575917) | 91,899213        | 88          | 91,899213  | 12                | 12               |
| rli98   | EGDe (NCBI) | 2361255..2361407             | 52,8570637       | 153         | 52,8570637 | 12                | 12               |
| LhrC-1  | EGDe (NCBI) | 231866..232004               | 92,1195948       | 139         | 92,1195948 | 11                | 19               |
| rli77   | EGDe (NCBI) | 454095..454227               | 55,7383698       | 133         | 55,7383698 | 11                | 11               |
| rli62   | EGDe (NCBI) | complement(2364285..2364497) | 34,8037708       | 213         | 34,8037708 | 11                | 11               |
| rli78   | EGDe (NCBI) | 507066..507199               | 45,2637915       | 134         | 45,2637915 | 9                 | 9                |
| rli53   | EGDe (NCBI) | 955824..956029               | 26,1719442       | 206         | 26,1719442 | 8                 | 8                |
| LhrC-5  | EGDe (NCBI) | 981620..981732               | 47,7116858       | 113         | 47,7116858 | 8                 | 8                |
| rli92   | EGDe (NCBI) | 1638942..1639083             | 33,2217812       | 142         | 33,2217812 | 7                 | 7                |
| rli29   | EGDe (NCBI) | complement(507418..507632)   | 18,8072808       | 215         | 18,8072808 | 6                 | 6                |
| rli81   | EGDe (NCBI) | 905683..905860               | 22,7166594       | 178         | 22,7166594 | 6                 | 6                |
| rli87   | EGDe (NCBI) | 1301269..1301389             | 33,4178956       | 121         | 33,4178956 | 6                 | 6                |

|         |             |                              |            |     |            |   |   |
|---------|-------------|------------------------------|------------|-----|------------|---|---|
| rli108  | EGDe (NCBI) | complement(2639710..2639789) | 42,1204726 | 80  | 42,1204726 | 5 | 5 |
| rli55   | EGDe (NCBI) | 1198094..1198610             | 5,21413975 | 517 | 5,21413975 | 4 | 4 |
| rli42   | EGDe (NCBI) | complement(1399445..1399616) | 15,672734  | 172 | 15,672734  | 4 | 4 |
| rli45   | EGDe (NCBI) | 2154757..2154883             | 21,226065  | 127 | 21,226065  | 4 | 4 |
| rli100  | EGDe (NCBI) | complement(2424801..2424875) | 35,9428033 | 75  | 35,9428033 | 4 | 4 |
| rli1    | EGDe (NCBI) | complement(2841963..2842200) | 11,3265137 | 238 | 11,3265137 | 4 | 4 |
| LhrC-3  | EGDe (NCBI) | 232288..232401               | 17,7349358 | 114 | 17,7349358 | 3 | 3 |
| rli65   | EGDe (NCBI) | 531146..531281               | 14,8660492 | 136 | 14,8660492 | 3 | 3 |
| rli84   | EGDe (NCBI) | 1093855..1093954             | 20,2178269 | 100 | 20,2178269 | 3 | 3 |
| rli58   | EGDe (NCBI) | complement(1639909..1640182) | 7,37876893 | 274 | 7,37876893 | 3 | 3 |
| rli59   | EGDe (NCBI) | complement(1702295..1702543) | 8,11960918 | 249 | 8,11960918 | 3 | 3 |
| LhrB    | EGDe (NCBI) | complement(1859877..1860018) | 14,2379062 | 142 | 14,2379062 | 3 | 3 |
| rli63   | EGDe (NCBI) | complement(2613039..2613300) | 7,71672781 | 262 | 7,71672781 | 3 | 3 |
| rli51   | EGDe (NCBI) | 207589..207714               | 10,6972629 | 126 | 10,6972629 | 2 | 2 |
| LhrC-2  | EGDe (NCBI) | 232053..232207               | 8,69583951 | 155 | 8,69583951 | 2 | 2 |
| LhrC-4  | EGDe (NCBI) | 232459..232604               | 9,23188441 | 146 | 9,23188441 | 2 | 2 |
| rli44   | EGDe (NCBI) | 2039087..2039362             | 4,88353306 | 276 | 4,88353306 | 2 | 2 |
| rli46   | EGDe (NCBI) | complement(2154764..2154971) | 6,48007271 | 208 | 6,48007271 | 2 | 2 |
| rli101  | EGDe (NCBI) | complement(2452913..2452994) | 16,4372576 | 82  | 16,4372576 | 2 | 2 |
| rli24   | EGDe (NCBI) | 271014..271201               | 3,58472108 | 188 | 3,58472108 | 1 | 1 |
| rli76   | EGDe (NCBI) | complement(344675..344772)   | 6,87681186 | 98  | 6,87681186 | 1 | 1 |
| rli33-2 | EGDe (NCBI) | 708618..708891               | 2,45958964 | 274 | 2,45958964 | 1 | 1 |
| rli80   | EGDe (NCBI) | 787038..787317               | 2,40688415 | 280 | 2,40688415 | 1 | 1 |
| rli41   | EGDe (NCBI) | complement(1276706..1276847) | 4,74596875 | 142 | 4,74596875 | 1 | 1 |
| rli60   | EGDe (NCBI) | 2054110..2054356             | 2,72845167 | 247 | 2,72845167 | 1 | 1 |
| rli106  | EGDe (NCBI) | complement(2594654..2594785) | 5,10551184 | 132 | 5,10551184 | 1 | 1 |
| rli109  | EGDe (NCBI) | complement(2694473..2694623) | 4,46309644 | 151 | 4,46309644 | 1 | 1 |
| rli71   | EGDe (NCBI) | 28964..29061                 | 0          | 98  | 0          | 0 | 0 |
| rli73   | EGDe (NCBI) | 200939..201035               | 0          | 97  | 0          | 0 | 0 |
| rli74   | EGDe (NCBI) | 209321..209453               | 0          | 133 | 0          | 0 | 0 |
| rli75   | EGDe (NCBI) | 321290..321363               | 0          | 74  | 0          | 0 | 0 |
| rli27   | EGDe (NCBI) | 434817..434947               | 0          | 131 | 0          | 0 | 0 |
| rli52   | EGDe (NCBI) | complement(552313..552418)   | 0          | 106 | 0          | 0 | 0 |
| rli79   | EGDe (NCBI) | 696818..696880               | 0          | 63  | 0          | 0 | 0 |
| rli82   | EGDe (NCBI) | complement(910875..910944)   | 0          | 70  | 0          | 0 | 0 |
| rli83   | EGDe (NCBI) | 926922..927039               | 0          | 118 | 0          | 0 | 0 |
| rli38   | EGDe (NCBI) | 1152805..1152917             | 0          | 113 | 0          | 0 | 0 |
| rliC    | EGDe (NCBI) | 1154414..1154674             | 0          | 261 | 0          | 0 | 0 |
| rli85   | EGDe (NCBI) | complement(1154617..1154762) | 0          | 146 | 0          | 0 | 0 |
| rli89   | EGDe (NCBI) | 1399490..1399656             | 0          | 167 | 0          | 0 | 0 |
| rli93   | EGDe (NCBI) | 1641179..1641239             | 0          | 61  | 0          | 0 | 0 |
| rli94   | EGDe (NCBI) | complement(2039254..2039395) | 0          | 142 | 0          | 0 | 0 |
| rli95   | EGDe (NCBI) | 2106222..2106324             | 0          | 103 | 0          | 0 | 0 |
| rli96   | EGDe (NCBI) | complement(2239222..2239295) | 0          | 74  | 0          | 0 | 0 |
| rliG    | EGDe (NCBI) | complement(2386714..2386829) | 0          | 116 | 0          | 0 | 0 |
| rli99   | EGDe (NCBI) | 2394985..2395110             | 0          | 126 | 0          | 0 | 0 |
| rli102  | EGDe (NCBI) | 2454489..2454586             | 0          | 98  | 0          | 0 | 0 |
| rli103  | EGDe (NCBI) | complement(2498270..2498344) | 0          | 75  | 0          | 0 | 0 |
| rli104  | EGDe (NCBI) | complement(2505181..2505340) | 0          | 160 | 0          | 0 | 0 |
| rli105  | EGDe (NCBI) | complement(2533473..2533615) | 0          | 143 | 0          | 0 | 0 |
| rli107  | EGDe (NCBI) | complement(2632700..2632770) | 0          | 71  | 0          | 0 | 0 |
| rli110  | EGDe (NCBI) | 2730489..2730555             | 0          | 67  | 0          | 0 | 0 |
| rli113  | EGDe (NCBI) | complement(2839445..2839574) | 0          | 130 | 0          | 0 | 0 |



**Table S4. SecA2 associated mRNAs**

| Name+A2:H<br>72 | Chromosome  | Region                       | Expression<br>value | Gene length | RPKM       | Unique gene<br>reads* | Total gene<br>reads* |
|-----------------|-------------|------------------------------|---------------------|-------------|------------|-----------------------|----------------------|
| lmo0583         | EGDe (NCBI) | 620805..623135               | 600,4003898         | 2331        | 600,40039  | 2071                  | 2071                 |
| lmo0048         | EGDe (NCBI) | 51775..52389                 | 350,5247655         | 615         | 350,524766 | 319                   | 319                  |
| gap             | EGDe (NCBI) | complement(2531310..2532320) | 157,0796218         | 1011        | 157,079622 | 235                   | 235                  |
| lmo0355         | EGDe (NCBI) | 382016..383536               | 87,52661891         | 1521        | 87,5266189 | 197                   | 197                  |
| lmo2158         | EGDe (NCBI) | complement(2242097..2242282) | 693,9426228         | 186         | 693,942623 | 191                   | 191                  |
| tuf             | EGDe (NCBI) | complement(2726008..2727195) | 105,2345693         | 1188        | 105,234569 | 185                   | 185                  |
| lmo1634         | EGDe (NCBI) | 1677409..1680009             | 44,16840428         | 2601        | 44,1684043 | 170                   | 170                  |
| lmo2511         | EGDe (NCBI) | complement(2590044..2590607) | 180,9260007         | 564         | 180,926001 | 151                   | 151                  |
| lmo1601         | EGDe (NCBI) | complement(1645412..1645936) | 193,0790244         | 525         | 193,079024 | 150                   | 150                  |
| fbaA            | EGDe (NCBI) | complement(2632907..2633761) | 117,7669137         | 855         | 117,766914 | 149                   | 149                  |
| lmo0197         | EGDe (NCBI) | 200522..200830               | 323,6729277         | 309         | 323,672928 | 148                   | 148                  |
| glpD            | EGDe (NCBI) | 1320608..1322284             | 50,37094406         | 1677        | 50,3709441 | 125                   | 125                  |
| lmo1003         | EGDe (NCBI) | 1033190..1034908             | 45,99526499         | 1719        | 45,995265  | 117                   | 117                  |
| fus             | EGDe (NCBI) | complement(2727304..2729391) | 37,86679143         | 2088        | 37,8667914 | 117                   | 117                  |
| lmo1399         | EGDe (NCBI) | 1426766..1428328             | 49,7212459          | 1563        | 49,7212459 | 115                   | 115                  |
| rpoD            | EGDe (NCBI) | complement(1486480..1487604) | 67,27731341         | 1125        | 67,2773134 | 112                   | 112                  |
| ctc             | EGDe (NCBI) | 215721..216344               | 116,9613321         | 624         | 116,961332 | 108                   | 108                  |
| lmo1847         | EGDe (NCBI) | complement(1923825..1924757) | 75,32772229         | 933         | 75,3277223 | 104                   | 104                  |
| fri             | EGDe (NCBI) | 979059..979529               | 142,0422123         | 471         | 142,042212 | 99                    | 99                   |
| ldh             | EGDe (NCBI) | complement(214486..215427)   | 68,86895139         | 942         | 68,8689514 | 96                    | 96                   |
| lmo0913         | EGDe (NCBI) | 948754..950220               | 44,22259865         | 1467        | 44,2225986 | 96                    | 96                   |
| lmo0539         | EGDe (NCBI) | complement(577632..578648)   | 62,46115933         | 1017        | 62,4611593 | 94                    | 94                   |
| lmo1254         | EGDe (NCBI) | complement(1278056..1279702) | 38,56891259         | 1647        | 38,5689126 | 94                    | 94                   |
| lmo1257         | EGDe (NCBI) | complement(1281820..1282284) | 130,7954682         | 465         | 130,795468 | 90                    | 90                   |
| lmo2219         | EGDe (NCBI) | 2306833..2307714             | 68,19060784         | 882         | 68,1906078 | 89                    | 89                   |
| hup             | EGDe (NCBI) | complement(2008319..2008594) | 215,4649983         | 276         | 215,464998 | 88                    | 88                   |
| glpK            | EGDe (NCBI) | complement(1573354..1574847) | 39,35245177         | 1494        | 39,3524518 | 87                    | 87                   |
| lmo1848         | EGDe (NCBI) | complement(1924754..1925596) | 68,94043459         | 843         | 68,9404346 | 86                    | 86                   |
| groEL           | EGDe (NCBI) | complement(2147684..2149312) | 33,60215066         | 1629        | 33,6021507 | 81                    | 81                   |
| eno             | EGDe (NCBI) | complement(2526222..2527514) | 38,67553545         | 1293        | 38,6755354 | 74                    | 74                   |
| lmo2586         | EGDe (NCBI) | complement(2665666..2668653) | 15,15295557         | 2988        | 15,1529556 | 67                    | 67                   |
| lmo2205         | EGDe (NCBI) | complement(2293775..2294464) | 60,72195406         | 690         | 60,7219541 | 62                    | 62                   |
| ftsH            | EGDe (NCBI) | 226854..228929               | 19,2055966          | 2076        | 19,2055966 | 59                    | 59                   |
| pgm             | EGDe (NCBI) | complement(2527650..2529182) | 26,00836174         | 1533        | 26,0083617 | 59                    | 59                   |
| rpoC            | EGDe (NCBI) | 276728..280333               | 10,869396           | 3606        | 10,869396  | 58                    | 58                   |
| lmo2196         | EGDe (NCBI) | complement(2284539..2286215) | 23,37211805         | 1677        | 23,372118  | 58                    | 58                   |
| lmo2637         | EGDe (NCBI) | complement(2709522..2710421) | 43,55004662         | 900         | 43,5500466 | 58                    | 58                   |
| clpX            | EGDe (NCBI) | 1291710..1292969             | 30,57084554         | 1260        | 30,5708455 | 57                    | 57                   |
| sod             | EGDe (NCBI) | complement(1472980..1473588) | 63,25002525         | 609         | 63,2500252 | 57                    | 57                   |
| cspB            | EGDe (NCBI) | complement(2094877..2095077) | 191,6381362         | 201         | 191,638136 | 57                    | 57                   |
| dnaK            | EGDe (NCBI) | complement(1505312..1507153) | 20,54478219         | 1842        | 20,5447822 | 56                    | 56                   |
| lmo2638         | EGDe (NCBI) | 2710869..2712755             | 19,69672083         | 1887        | 19,6967208 | 55                    | 55                   |
| lmo2695         | EGDe (NCBI) | 2771623..2772612             | 37,54314364         | 990         | 37,5431436 | 55                    | 55                   |
| clpC            | EGDe (NCBI) | 250592..253054               | 14,81605181         | 2463        | 14,8160518 | 54                    | 54                   |
| lmo0641         | EGDe (NCBI) | 681543..683423               | 19,40028475         | 1881        | 19,4002848 | 54                    | 54                   |
| lmo1468         | EGDe (NCBI) | complement(1501415..1501861) | 80,12563542         | 447         | 80,1256354 | 53                    | 53                   |
| lmo1674         | EGDe (NCBI) | complement(1727824..1728651) | 43,25623072         | 828         | 43,2562307 | 53                    | 53                   |
| tig             | EGDe (NCBI) | 1290241..1291524             | 27,3678991          | 1284        | 27,3678991 | 52                    | 52                   |
| lmo1502         | EGDe (NCBI) | complement(1531716..1532132) | 84,26950228         | 417         | 84,2695023 | 52                    | 52                   |
| rpsB            | EGDe (NCBI) | complement(1707168..1707917) | 46,85384327         | 750         | 46,8538433 | 52                    | 52                   |
| acpP            | EGDe (NCBI) | complement(1881041..1881274) | 147,2846404         | 234         | 147,28464  | 51                    | 51                   |
| clpB            | EGDe (NCBI) | complement(2294555..2297155) | 12,99070714         | 2601        | 12,9907071 | 50                    | 50                   |
| lmo0134         | EGDe (NCBI) | 136714..136992               | 118,6847767         | 279         | 118,684777 | 49                    | 49                   |
| cydB            | EGDe (NCBI) | complement(2791967..2792980) | 32,65587051         | 1014        | 32,6558705 | 49                    | 49                   |
| ssb             | EGDe (NCBI) | 49934..50470                 | 60,404611           | 537         | 60,404611  | 48                    | 48                   |
| rplL            | EGDe (NCBI) | 267010..267372               | 89,35888735         | 363         | 89,3588873 | 48                    | 48                   |
| inlA            | EGDe (NCBI) | 454534..456936               | 13,49865839         | 2403        | 13,4986584 | 48                    | 48                   |
| PdhD            | EGDe (NCBI) | 1082822..1084225             | 22,62215066         | 1404        | 22,6221507 | 47                    | 47                   |
| pflB            | EGDe (NCBI) | 1435635..1437866             | 14,23006251         | 2232        | 14,2300625 | 47                    | 47                   |
| lmo1580         | EGDe (NCBI) | 1622583..1623047             | 66,85101707         | 465         | 66,8510171 | 46                    | 46                   |
| lmo1255         | EGDe (NCBI) | complement(1279721..1281205) | 20,02300994         | 1485        | 20,0230099 | 44                    | 44                   |
| cspL            | EGDe (NCBI) | 1387014..1387214             | 147,9311929         | 201         | 147,931193 | 44                    | 44                   |
| pykA            | EGDe (NCBI) | complement(1608166..1609923) | 16,91363468         | 1758        | 16,9136347 | 44                    | 44                   |
| tcsA            | EGDe (NCBI) | 1413646..1414719             | 27,05623201         | 1074        | 27,056232  | 43                    | 43                   |
| dnaJ            | EGDe (NCBI) | complement(1504037..1505170) | 25,62468534         | 1134        | 25,6246853 | 43                    | 43                   |
| rplJ            | EGDe (NCBI) | 266431..266931               | 55,30307387         | 501         | 55,3030739 | 41                    | 41                   |
| lmo1541         | EGDe (NCBI) | complement(1576411..1576728) | 87,1284277          | 318         | 87,1284277 | 41                    | 41                   |
| lmo1539         | EGDe (NCBI) | complement(1574922..1575740) | 33,00496144         | 819         | 33,0049614 | 40                    | 40                   |
| tsf             | EGDe (NCBI) | complement(1706204..1707088) | 30,54357449         | 885         | 30,5435745 | 40                    | 40                   |
| rpsD            | EGDe (NCBI) | 1639120..1639722             | 43,70694334         | 603         | 43,7069433 | 39                    | 39                   |

|         |             |                              |             |      |            |    |    |
|---------|-------------|------------------------------|-------------|------|------------|----|----|
| mecA    | EGDe (NCBI) | complement(2278639..2279292) | 40,29860373 | 654  | 40,2986037 | 39 | 39 |
| kat     | EGDe (NCBI) | complement(2871318..2872784) | 17,9654307  | 1467 | 17,9654307 | 39 | 39 |
| lmo0196 | EGDe (NCBI) | 200094..200402               | 83,10521117 | 309  | 83,1052112 | 38 | 38 |
| lmo0415 | EGDe (NCBI) | 437482..438882               | 18,32941488 | 1401 | 18,3294149 | 38 | 38 |
| rplA    | EGDe (NCBI) | 265494..266183               | 36,23729517 | 690  | 36,2372952 | 37 | 37 |
| lmo2411 | EGDe (NCBI) | complement(2481732..2483126) | 17,92382342 | 1395 | 17,9238234 | 37 | 37 |
| gyrA    | EGDe (NCBI) | 8065..10593                  | 9,619595524 | 2529 | 9,61959552 | 36 | 36 |
| lmo0788 | EGDe (NCBI) | 813451..817878               | 5,494118582 | 4428 | 5,49411858 | 36 | 36 |
| lmo1883 | EGDe (NCBI) | complement(1955598..1956656) | 22,33444806 | 1059 | 22,3344481 | 35 | 35 |
| sigB    | EGDe (NCBI) | 930671..931450               | 29,45692809 | 780  | 29,4569281 | 34 | 34 |
| infC    | EGDe (NCBI) | complement(1859272..1859787) | 44,52791455 | 516  | 44,5279146 | 34 | 34 |
| fur     | EGDe (NCBI) | complement(2030744..2031196) | 50,72053843 | 453  | 50,7205384 | 34 | 34 |
| lmo2101 | EGDe (NCBI) | 2181329..2182216             | 25,87432873 | 888  | 25,8743287 | 34 | 34 |
| lmo2449 | EGDe (NCBI) | complement(2520415..2522796) | 9,362144132 | 2382 | 9,36214413 | 33 | 33 |
| lmo0098 | EGDe (NCBI) | 105951..106862               | 23,71145914 | 912  | 23,7114591 | 32 | 32 |
| lmo0781 | EGDe (NCBI) | complement(804887..805765)   | 23,83284886 | 879  | 23,8328489 | 31 | 31 |
| rpsA    | EGDe (NCBI) | complement(2012582..2013727) | 18,28016942 | 1146 | 18,2801694 | 31 | 31 |
| trxB    | EGDe (NCBI) | complement(2553414..2554373) | 21,82195224 | 960  | 21,8219522 | 31 | 31 |
| lmo2696 | EGDe (NCBI) | 2772634..2773230             | 35,09057647 | 597  | 35,0905765 | 31 | 31 |
| lmo0265 | EGDe (NCBI) | 287853..288992               | 17,78359436 | 1140 | 17,7835944 | 30 | 30 |
| lmo2434 | EGDe (NCBI) | complement(2502401..2503804) | 14,43967063 | 1404 | 14,4396706 | 30 | 30 |
| atpC    | EGDe (NCBI) | complement(2605697..2606101) | 50,05752486 | 405  | 50,0575249 | 30 | 30 |
| lmo2673 | EGDe (NCBI) | 2745907..2746377             | 43,04309462 | 471  | 43,0430946 | 30 | 30 |
| murC    | EGDe (NCBI) | complement(1648511..1649854) | 14,58148883 | 1344 | 14,5814888 | 29 | 29 |
| sepA    | EGDe (NCBI) | complement(2240068..2241969) | 10,30363879 | 1902 | 10,3036388 | 29 | 29 |
| rplK    | EGDe (NCBI) | 265029..265454               | 44,41724037 | 426  | 44,4172404 | 28 | 28 |
| lmo0401 | EGDe (NCBI) | 421469..424096               | 7,200054945 | 2628 | 7,20005495 | 28 | 28 |
| clpE    | EGDe (NCBI) | complement(1026871..1029045) | 8,699652596 | 2175 | 8,6996526  | 28 | 28 |
| lmo1578 | EGDe (NCBI) | 1620091..1621188             | 17,23291839 | 1098 | 17,2329184 | 28 | 28 |
| lmo1579 | EGDe (NCBI) | complement(1621230..1622342) | 17,00066882 | 1113 | 17,0006688 | 28 | 28 |
| lmo1694 | EGDe (NCBI) | 1757771..1758673             | 20,95431273 | 903  | 20,9543127 | 28 | 28 |
| lmo2085 | EGDe (NCBI) | complement(2162323..2164011) | 11,20292741 | 1689 | 11,2029274 | 28 | 28 |
| atpD    | EGDe (NCBI) | complement(2606123..2607544) | 13,30643066 | 1422 | 13,3064307 | 28 | 28 |
| recA    | EGDe (NCBI) | 1425419..1426465             | 17,42690335 | 1047 | 17,4269034 | 27 | 27 |
| uvrA    | EGDe (NCBI) | complement(2562591..2565461) | 6,355265695 | 2871 | 6,35526569 | 27 | 27 |
| pbpB    | EGDe (NCBI) | complement(2121483..2123738) | 7,78820533  | 2256 | 7,78820533 | 26 | 26 |
| ptsH    | EGDe (NCBI) | 1032924..1033190             | 63,27496119 | 267  | 63,2749612 | 25 | 25 |
| pycA    | EGDe (NCBI) | 1099266..1102706             | 4,909739796 | 3441 | 4,9097398  | 25 | 25 |
| lmo1340 | EGDe (NCBI) | 1367559..1368650             | 15,47107568 | 1092 | 15,4710757 | 25 | 25 |
| rpmA    | EGDe (NCBI) | complement(1576107..1576397) | 58,05640769 | 291  | 58,0564077 | 25 | 25 |
| lmo1068 | EGDe (NCBI) | 1095975..1096835             | 18,83697799 | 861  | 18,836978  | 24 | 24 |
| pflC    | EGDe (NCBI) | 1437943..1438689             | 21,71169753 | 747  | 21,7116975 | 24 | 24 |
| purB    | EGDe (NCBI) | complement(1845044..1846336) | 12,5434169  | 1293 | 12,5434169 | 24 | 24 |
| secY    | EGDe (NCBI) | complement(2695476..2696771) | 12,51438121 | 1296 | 12,5143812 | 24 | 24 |
| qoxB    | EGDe (NCBI) | 17344..19323                 | 7,849930034 | 1980 | 7,84993003 | 23 | 23 |
| nifJ    | EGDe (NCBI) | 855759..859406               | 4,260652815 | 3648 | 4,26065281 | 23 | 23 |
| spxU    | EGDe (NCBI) | complement(1501881..1502054) | 89,32679004 | 174  | 89,32679   | 23 | 23 |
| spxA    | EGDe (NCBI) | complement(2279524..2279919) | 39,24965017 | 396  | 39,2496502 | 23 | 23 |
| lmo2828 | EGDe (NCBI) | complement(2915744..2916097) | 43,90638833 | 354  | 43,9063883 | 23 | 23 |
| rpsR    | EGDe (NCBI) | 50514..50753                 | 61,94618701 | 240  | 61,946187  | 22 | 22 |
| lmo1376 | EGDe (NCBI) | 1400941..1402359             | 10,47715637 | 1419 | 10,4771564 | 22 | 22 |
| secA    | EGDe (NCBI) | complement(2587300..2589813) | 5,913717137 | 2514 | 5,91371714 | 22 | 22 |
| lmo2668 | EGDe (NCBI) | complement(2740888..2742957) | 7,18216661  | 2070 | 7,18216661 | 22 | 22 |
| lmo0010 | EGDe (NCBI) | 12918..13886                 | 14,645313   | 969  | 14,645313  | 21 | 21 |
| lmo0392 | EGDe (NCBI) | 415224..416168               | 15,01725746 | 945  | 15,0172575 | 21 | 21 |
| lmo0653 | EGDe (NCBI) | complement(695496..696416)   | 15,40858664 | 921  | 15,4085866 | 21 | 21 |
| lmo1350 | EGDe (NCBI) | 1375462..1376928             | 9,673693454 | 1467 | 9,67369345 | 21 | 21 |
| ccpA    | EGDe (NCBI) | complement(1642865..1643872) | 14,07867887 | 1008 | 14,0786789 | 21 | 21 |
| trmD    | EGDe (NCBI) | complement(1864657..1865394) | 19,22941504 | 738  | 19,229415  | 21 | 21 |
| lmo2384 | EGDe (NCBI) | 2460090..2460683             | 23,89109141 | 594  | 23,8910914 | 21 | 21 |
| gltX    | EGDe (NCBI) | 256983..258458               | 9,156864303 | 1476 | 9,1568643  | 20 | 20 |
| hrcA    | EGDe (NCBI) | complement(1507804..1508841) | 13,02074346 | 1038 | 13,0207435 | 20 | 20 |
| lmo1830 | EGDe (NCBI) | 1905952..1906551             | 22,52588619 | 600  | 22,5258862 | 20 | 20 |
| lmo1992 | EGDe (NCBI) | 2065698..2066417             | 18,77157182 | 720  | 18,7715718 | 20 | 20 |
| lmo2102 | EGDe (NCBI) | 2182218..2182784             | 23,8369166  | 567  | 23,8369166 | 20 | 20 |
| lmo2572 | EGDe (NCBI) | complement(2650231..2650755) | 25,74386993 | 525  | 25,7438699 | 20 | 20 |
| lmo2672 | EGDe (NCBI) | complement(2744985..2745791) | 16,74787077 | 807  | 16,7478708 | 20 | 20 |
| lmo0133 | EGDe (NCBI) | 136469..136702               | 54,8707484  | 234  | 54,8707484 | 19 | 19 |

|         |             |                              |             |      |            |    |    |
|---------|-------------|------------------------------|-------------|------|------------|----|----|
| lmo0515 | EGDe (NCBI) | 549438..549869               | 29,72165538 | 432  | 29,7216554 | 19 | 19 |
| lmo0994 | EGDe (NCBI) | complement(1024761..1025129) | 34,79608435 | 369  | 34,7960844 | 19 | 19 |
| lmo1718 | EGDe (NCBI) | complement(1779714..1780802) | 11,79040875 | 1089 | 11,7904087 | 19 | 19 |
| adk     | EGDe (NCBI) | complement(2694769..2695416) | 19,81443692 | 648  | 19,8144369 | 19 | 19 |
| lmo2713 | EGDe (NCBI) | complement(2786435..2787373) | 13,67386062 | 939  | 13,6738606 | 19 | 19 |
| lmo0050 | EGDe (NCBI) | 52630..53925                 | 9,385785911 | 1296 | 9,38578591 | 18 | 18 |
| lmo0727 | EGDe (NCBI) | 756738..758543               | 6,735314806 | 1806 | 6,73531481 | 18 | 18 |
| lmo0796 | EGDe (NCBI) | complement(823638..824168)   | 22,90768087 | 531  | 22,9076809 | 18 | 18 |
| lmo0953 | EGDe (NCBI) | 987274..987501               | 53,35078307 | 228  | 53,3507831 | 18 | 18 |
| lmo1301 | EGDe (NCBI) | complement(1329696..1330217) | 23,30264088 | 522  | 23,3026409 | 18 | 18 |
| rpsT    | EGDe (NCBI) | 1513917..1514171             | 47,70187663 | 255  | 47,7018766 | 18 | 18 |
| aspS    | EGDe (NCBI) | complement(1550854..1552629) | 6,849087016 | 1776 | 6,84908702 | 18 | 18 |
| lmo1780 | EGDe (NCBI) | complement(1855952..1857184) | 9,865351614 | 1233 | 9,86535161 | 18 | 18 |
| rplS    | EGDe (NCBI) | complement(1861907..1862251) | 35,25790881 | 345  | 35,2579088 | 18 | 18 |
| pgi     | EGDe (NCBI) | complement(2444231..2445583) | 8,990375861 | 1353 | 8,99037586 | 18 | 18 |
| pgk     | EGDe (NCBI) | complement(2529985..2531175) | 10,21324814 | 1191 | 10,2132481 | 18 | 18 |
| rpsE    | EGDe (NCBI) | complement(2697463..2697966) | 24,13487806 | 504  | 24,1348781 | 18 | 18 |
| guaB    | EGDe (NCBI) | complement(2837944..2839410) | 8,291737246 | 1467 | 8,29173725 | 18 | 18 |
| rpoB    | EGDe (NCBI) | 273003..276557               | 3,231561731 | 3555 | 3,23156173 | 17 | 17 |
| lmo0722 | EGDe (NCBI) | 751598..753328               | 6,636742897 | 1731 | 6,6367429  | 17 | 17 |
| pdhC    | EGDe (NCBI) | 1081183..1082817             | 7,026423214 | 1635 | 7,02642321 | 17 | 17 |
| lmo1059 | EGDe (NCBI) | 1086100..1086630             | 21,63503193 | 531  | 21,6350319 | 17 | 17 |
| infB    | EGDe (NCBI) | 1353696..1356035             | 4,909488015 | 2340 | 4,90948801 | 17 | 17 |
| lmo1509 | EGDe (NCBI) | complement(1539979..1542375) | 4,792741742 | 2397 | 4,79274174 | 17 | 17 |
| lmo1687 | EGDe (NCBI) | complement(1752413..1752940) | 21,75795825 | 528  | 21,7579582 | 17 | 17 |
| asnC    | EGDe (NCBI) | complement(1969037..1970329) | 8,884920305 | 1293 | 8,88492031 | 17 | 17 |
| lmo2173 | EGDe (NCBI) | complement(2255034..2256401) | 8,397808446 | 1368 | 8,39780845 | 17 | 17 |
| lmo2560 | EGDe (NCBI) | complement(2639930..2640466) | 21,39329973 | 537  | 21,3932997 | 17 | 17 |
| rplC    | EGDe (NCBI) | complement(2705082..2705711) | 18,2352412  | 630  | 18,2352412 | 17 | 17 |
| lmo2738 | EGDe (NCBI) | complement(2813949..2815283) | 8,605394722 | 1335 | 8,60539472 | 17 | 17 |
| rsbX    | EGDe (NCBI) | 931451..932050               | 18,02070895 | 600  | 18,0207089 | 16 | 16 |
| lmo0937 | EGDe (NCBI) | complement(973509..973670)   | 66,74336647 | 162  | 66,7433665 | 16 | 16 |
| lmo1027 | EGDe (NCBI) | complement(1055393..1057060) | 6,482269406 | 1668 | 6,48226941 | 16 | 16 |
| guaA    | EGDe (NCBI) | 1129945..1131501             | 6,944396512 | 1557 | 6,94439651 | 16 | 16 |
| lmo1434 | EGDe (NCBI) | complement(1465638..1467305) | 6,482269406 | 1668 | 6,48226941 | 16 | 16 |
| alaS    | EGDe (NCBI) | complement(1532493..1535132) | 4,09561567  | 2640 | 4,09561567 | 16 | 16 |
| pbpA    | EGDe (NCBI) | 1964489..1966972             | 4,352828248 | 2484 | 4,35282825 | 16 | 16 |
| lmo1930 | EGDe (NCBI) | complement(2004977..2005942) | 11,19298692 | 966  | 11,1929869 | 16 | 16 |
| ftsZ    | EGDe (NCBI) | complement(2112492..2113667) | 9,194239259 | 1176 | 9,19423926 | 16 | 16 |
| mscL    | EGDe (NCBI) | 2145127..2145513             | 27,93908364 | 387  | 27,9390836 | 16 | 16 |
| lmo2386 | EGDe (NCBI) | 2461219..2461692             | 22,81102399 | 474  | 22,811024  | 16 | 16 |
| lmo2425 | EGDe (NCBI) | complement(2494891..2495268) | 28,60429992 | 378  | 28,6042999 | 16 | 16 |
| ami     | EGDe (NCBI) | 2635167..2637920             | 3,926080381 | 2754 | 3,92608038 | 16 | 16 |
| lmo0027 | EGDe (NCBI) | 29100..31004                 | 5,321075477 | 1905 | 5,32107548 | 15 | 15 |
| inlH    | EGDe (NCBI) | 284365..286011               | 6,154613712 | 1647 | 6,15461371 | 15 | 15 |
| lmo0292 | EGDe (NCBI) | 316873..318375               | 6,744277301 | 1503 | 6,7442773  | 15 | 15 |
| lmo0540 | EGDe (NCBI) | 578886..580079               | 8,489655597 | 1194 | 8,4896556  | 15 | 15 |
| lmo0553 | EGDe (NCBI) | complement(591412..592047)   | 15,93812702 | 636  | 15,938127  | 15 | 15 |
| lmo0739 | EGDe (NCBI) | 769639..771012               | 7,377473641 | 1374 | 7,37747364 | 15 | 15 |
| lmo0956 | EGDe (NCBI) | 989099..990232               | 8,938843724 | 1134 | 8,93884372 | 15 | 15 |
| trxA    | EGDe (NCBI) | 1259530..1259841             | 32,48925892 | 312  | 32,4892589 | 15 | 15 |
| lmo1529 | EGDe (NCBI) | complement(1564776..1565105) | 30,71711753 | 330  | 30,7171175 | 15 | 15 |
| lmo1576 | EGDe (NCBI) | complement(1617901..1619214) | 7,714344584 | 1314 | 7,71434458 | 15 | 15 |
| menE    | EGDe (NCBI) | complement(1725584..1726993) | 7,189112612 | 1410 | 7,18911261 | 15 | 15 |
| rpsP    | EGDe (NCBI) | complement(1867427..1867699) | 37,13058162 | 273  | 37,1305816 | 15 | 15 |
| lmo1849 | EGDe (NCBI) | complement(1925600..1926322) | 14,02026111 | 723  | 14,0202611 | 15 | 15 |
| lmo1859 | EGDe (NCBI) | complement(1934321..1934758) | 23,14303375 | 438  | 23,1430338 | 15 | 15 |
| hemH    | EGDe (NCBI) | complement(2300334..2301263) | 10,89962235 | 930  | 10,8996223 | 15 | 15 |
| lmo2220 | EGDe (NCBI) | complement(2307755..2308696) | 10,76077366 | 942  | 10,7607737 | 15 | 15 |
| lmo2389 | EGDe (NCBI) | complement(2463969..2465180) | 8,363571603 | 1212 | 8,3635716  | 15 | 15 |
| lmo2585 | EGDe (NCBI) | complement(2665190..2665666) | 21,25083602 | 477  | 21,250836  | 15 | 15 |
| lmo0650 | EGDe (NCBI) | 691581..694271               | 3,515745893 | 2691 | 3,51574589 | 14 | 14 |
| lmo0721 | EGDe (NCBI) | complement(750680..751327)   | 14,60011142 | 648  | 14,6001114 | 14 | 14 |
| lmo0738 | EGDe (NCBI) | 767766..769619               | 5,102951563 | 1854 | 5,10295156 | 14 | 14 |
| lmo0782 | EGDe (NCBI) | complement(805784..806596)   | 11,63698917 | 813  | 11,6369892 | 14 | 14 |
| PdhB    | EGDe (NCBI) | 1080095..1081072             | 9,673693454 | 978  | 9,67369345 | 14 | 14 |
| glnA    | EGDe (NCBI) | 1326879..1328213             | 7,086795654 | 1335 | 7,08679565 | 14 | 14 |
| tkf     | EGDe (NCBI) | 1331813..1333807             | 4,742291828 | 1995 | 4,74229183 | 14 | 14 |
| lmo1501 | EGDe (NCBI) | complement(1531398..1531700) | 31,22400065 | 303  | 31,2240007 | 14 | 14 |
| pfkA    | EGDe (NCBI) | complement(1610206..1611165) | 9,855075206 | 960  | 9,85507521 | 14 | 14 |

|         |             |                              |             |      |            |    |    |
|---------|-------------|------------------------------|-------------|------|------------|----|----|
| lmo1620 | EGDe (NCBI) | complement(1662570..1663982) | 6,695592497 | 1413 | 6,6955925  | 14 | 14 |
| pflA    | EGDe (NCBI) | 1991047..1993326             | 4,14950535  | 2280 | 4,14950535 | 14 | 14 |
| lmo2483 | EGDe (NCBI) | complement(2558130..2559068) | 10,07547625 | 939  | 10,0754762 | 14 | 14 |
| lmo2571 | EGDe (NCBI) | complement(2649598..2650230) | 14,94608562 | 633  | 14,9460856 | 14 | 14 |
| rpsG    | EGDe (NCBI) | complement(2729457..2729927) | 20,08677749 | 471  | 20,0867775 | 14 | 14 |
| lmo2697 | EGDe (NCBI) | 2773234..2773608             | 25,22899253 | 375  | 25,2289925 | 14 | 14 |
| cydD    | EGDe (NCBI) | complement(2788504..2790243) | 5,437282872 | 1740 | 5,43728287 | 14 | 14 |
| dnaC    | EGDe (NCBI) | 57286..58638                 | 6,493049233 | 1353 | 6,49304923 | 13 | 13 |
| lmo0400 | EGDe (NCBI) | 420335..421447               | 7,893167666 | 1113 | 7,89316767 | 13 | 13 |
| lmo0402 | EGDe (NCBI) | 424130..426064               | 4,540101092 | 1935 | 4,54010109 | 13 | 13 |
| lmo0555 | EGDe (NCBI) | 593528..595006               | 5,939888852 | 1479 | 5,93988885 | 13 | 13 |
| rsbW    | EGDe (NCBI) | 930220..930693               | 18,53395699 | 474  | 18,533957  | 13 | 13 |
| lmo0964 | EGDe (NCBI) | complement(996739..997557)   | 10,72661247 | 819  | 10,7266125 | 13 | 13 |
| recN    | EGDe (NCBI) | 1390694..1392385             | 5,192136887 | 1692 | 5,19213689 | 13 | 13 |
| lmo1395 | EGDe (NCBI) | 1422236..1423165             | 9,446339368 | 930  | 9,44633937 | 13 | 13 |
| lmo1527 | EGDe (NCBI) | complement(1561978..1564242) | 3,878629409 | 2265 | 3,87862941 | 13 | 13 |
| rplU    | EGDe (NCBI) | complement(1576747..1577055) | 28,43073014 | 309  | 28,4307301 | 13 | 13 |
| lmo1602 | EGDe (NCBI) | complement(1645958..1646413) | 19,26556055 | 456  | 19,2655606 | 13 | 13 |
| lmo1606 | EGDe (NCBI) | complement(1650149..1652500) | 3,735159699 | 2352 | 3,7351597  | 13 | 13 |
| lmo1819 | EGDe (NCBI) | complement(1892603..1893478) | 10,02864796 | 876  | 10,028648  | 13 | 13 |
| lmo2471 | EGDe (NCBI) | complement(2545487..2546503) | 8,63824544  | 1017 | 8,63824544 | 13 | 13 |
| atpI    | EGDe (NCBI) | complement(2612205..2612603) | 22,01778349 | 399  | 22,0177835 | 13 | 13 |
| lmo2573 | EGDe (NCBI) | complement(2650758..2651756) | 8,793889502 | 999  | 8,7938895  | 13 | 13 |
| rpoA    | EGDe (NCBI) | complement(2692097..2693041) | 9,296397473 | 945  | 9,29639747 | 13 | 13 |
| rpsL    | EGDe (NCBI) | complement(2729958..2730371) | 21,22003771 | 414  | 21,2200377 | 13 | 13 |
| cydC    | EGDe (NCBI) | complement(2790243..2791967) | 5,092809051 | 1725 | 5,09280905 | 13 | 13 |
| qoxC    | EGDe (NCBI) | 19311..19922                 | 13,25052129 | 612  | 13,2505213 | 12 | 12 |
| lmo0043 | EGDe (NCBI) | 48074..49306                 | 6,576901076 | 1233 | 6,57690108 | 12 | 12 |
| metS    | EGDe (NCBI) | 175766..177760               | 4,064821567 | 1995 | 4,06482157 | 12 | 12 |
| lmo0242 | EGDe (NCBI) | 262064..262576               | 15,80763943 | 513  | 15,8076394 | 12 | 12 |
| lmo0584 | EGDe (NCBI) | 623251..624423               | 6,913315453 | 1173 | 6,91331545 | 12 | 12 |
| lmo0625 | EGDe (NCBI) | complement(661470..662171)   | 11,55173651 | 702  | 11,5517365 | 12 | 12 |
| lmo0866 | EGDe (NCBI) | 905962..907524               | 5,18830392  | 1563 | 5,18830392 | 12 | 12 |
| lmo0931 | EGDe (NCBI) | 967784..968779               | 8,141886573 | 996  | 8,14188657 | 12 | 12 |
| lmo0958 | EGDe (NCBI) | 990968..991690               | 11,21620889 | 723  | 11,2162089 | 12 | 12 |
| rpsO    | EGDe (NCBI) | 1358834..1359103             | 30,03451491 | 270  | 30,0345149 | 12 | 12 |
| valS    | EGDe (NCBI) | complement(1586201..1588852) | 3,057812604 | 2652 | 3,0578126  | 12 | 12 |
| lmo1575 | EGDe (NCBI) | complement(1616945..1617880) | 8,663802379 | 936  | 8,66380238 | 12 | 12 |
| gatB    | EGDe (NCBI) | complement(1823494..1824924) | 5,668889606 | 1431 | 5,66888961 | 12 | 12 |
| groES   | EGDe (NCBI) | complement(2149348..2149632) | 28,45375097 | 285  | 28,453751  | 12 | 12 |
| lmo2256 | EGDe (NCBI) | complement(2345567..2346088) | 15,53509392 | 522  | 15,5350939 | 12 | 12 |
| lmo2475 | EGDe (NCBI) | complement(2549462..2551192) | 4,684759692 | 1731 | 4,68475969 | 12 | 12 |
| rplD    | EGDe (NCBI) | complement(2704433..2705056) | 12,99570357 | 624  | 12,9957036 | 12 | 12 |
| lmo2674 | EGDe (NCBI) | 2746423..2746878             | 17,78359436 | 456  | 17,7835944 | 12 | 12 |
| dnaX    | EGDe (NCBI) | complement(2777844..2779583) | 4,660528176 | 1740 | 4,66052818 | 12 | 12 |
| lmo2720 | EGDe (NCBI) | 2795420..2796997             | 5,138985442 | 1578 | 5,13898544 | 12 | 12 |
| lmo0305 | EGDe (NCBI) | 329923..330999               | 6,902082118 | 1077 | 6,90208212 | 11 | 11 |
| lmo0471 | EGDe (NCBI) | 507723..508733               | 7,352663147 | 1011 | 7,35266315 | 11 | 11 |
| lmo0763 | EGDe (NCBI) | 788642..789514               | 8,514939795 | 873  | 8,5149398  | 11 | 11 |
| lmo0794 | EGDe (NCBI) | complement(821886..822527)   | 11,57872654 | 642  | 11,5787265 | 11 | 11 |
| lmo0957 | EGDe (NCBI) | 990248..990952               | 10,54403183 | 705  | 10,5440318 | 11 | 11 |
| lmo1084 | EGDe (NCBI) | 1118082..1118912             | 8,945297763 | 831  | 8,94529776 | 11 | 11 |
| lmo1232 | EGDe (NCBI) | 1257092..1259449             | 3,15247771  | 2358 | 3,15247771 | 11 | 11 |
| lmo1349 | EGDe (NCBI) | 1374119..1375465             | 5,51859127  | 1347 | 5,51859127 | 11 | 11 |
| lmo1394 | EGDe (NCBI) | 1421454..1422185             | 10,15511262 | 732  | 10,1551126 | 11 | 11 |
| lmo1424 | EGDe (NCBI) | complement(1455316..1456662) | 5,51859127  | 1347 | 5,51859127 | 11 | 11 |
| menD    | EGDe (NCBI) | complement(1728653..1730395) | 4,264797729 | 1743 | 4,26479773 | 11 | 11 |
| lmo1690 | EGDe (NCBI) | 1755143..1756123             | 7,577515231 | 981  | 7,57751523 | 11 | 11 |
| lmo2067 | EGDe (NCBI) | complement(2146449..2147426) | 7,600759142 | 978  | 7,60075914 | 11 | 11 |
| lmo2113 | EGDe (NCBI) | 2192693..2193448             | 9,832728097 | 756  | 9,8327281  | 11 | 11 |
| fabG_2  | EGDe (NCBI) | complement(2257754..2258515) | 9,755305041 | 762  | 9,75530504 | 11 | 11 |
| lmo2267 | EGDe (NCBI) | complement(2352616..2356323) | 2,004730971 | 3708 | 2,00473097 | 11 | 11 |
| lmo2391 | EGDe (NCBI) | 2466713..2467342             | 11,79927372 | 630  | 11,7992737 | 11 | 11 |
| lmo2413 | EGDe (NCBI) | complement(2483589..2484815) | 6,058306798 | 1227 | 6,0583068  | 11 | 11 |
| lmo2462 | EGDe (NCBI) | complement(2535342..2536268) | 8,018923885 | 927  | 8,01892388 | 11 | 11 |
| lmo2515 | EGDe (NCBI) | complement(2593837..2594523) | 10,82029467 | 687  | 10,8202947 | 11 | 11 |
| atpH    | EGDe (NCBI) | complement(2610056..2610595) | 13,76581934 | 540  | 13,7658193 | 11 | 11 |
| lmo2671 | EGDe (NCBI) | complement(2744571..2744939) | 20,14510147 | 369  | 20,1451015 | 11 | 11 |
| lmo2760 | EGDe (NCBI) | complement(2840286..2841896) | 4,614241118 | 1611 | 4,61424112 | 11 | 11 |
| rpmH    | EGDe (NCBI) | complement(2943569..2943703) | 55,06327734 | 135  | 55,0632773 | 11 | 11 |

|                     |             |                              |             |      |            |    |    |
|---------------------|-------------|------------------------------|-------------|------|------------|----|----|
| lmo0052             | EGDe (NCBI) | 54839..56812                 | 3,423386958 | 1974 | 3,42338696 | 10 | 10 |
| lmo0135             | EGDe (NCBI) | 137323..138897               | 4,290644988 | 1575 | 4,29064499 | 10 | 10 |
| lmo0192             | EGDe (NCBI) | 195793..196611               | 8,251240361 | 819  | 8,25124036 | 10 | 10 |
| lysS                | EGDe (NCBI) | 235524..237020               | 4,514205648 | 1497 | 4,51420565 | 10 | 10 |
| lmo0231             | EGDe (NCBI) | 249541..250563               | 6,605831726 | 1023 | 6,60583173 | 10 | 10 |
| lmo0291             | EGDe (NCBI) | 315945..316775               | 8,132088876 | 831  | 8,13208888 | 10 | 10 |
| lmo0592             | EGDe (NCBI) | 633709..634251               | 12,44524099 | 543  | 12,445241  | 10 | 10 |
| lmo0626             | EGDe (NCBI) | complement(662257..663936)   | 4,022479676 | 1680 | 4,02247968 | 10 | 10 |
| lmo1087             | EGDe (NCBI) | 1121805..1122830             | 6,586516428 | 1026 | 6,58651643 | 10 | 10 |
| lmo1218             | EGDe (NCBI) | 1239039..1239797             | 8,903512326 | 759  | 8,90351233 | 10 | 10 |
| pheT_1              | EGDe (NCBI) | 1242100..1244508             | 2,805216212 | 2409 | 2,80521621 | 10 | 10 |
| lmo1261             | EGDe (NCBI) | complement(1285610..1286749) | 5,927864786 | 1140 | 5,92786479 | 10 | 10 |
| lmo1303             | EGDe (NCBI) | 1331018..1331347             | 20,47807835 | 330  | 20,4780784 | 10 | 10 |
| pnpA                | EGDe (NCBI) | 1359352..1361523             | 3,111310247 | 2172 | 3,11131025 | 10 | 10 |
| lmo1386             | EGDe (NCBI) | 1410148..1412421             | 2,971752795 | 2274 | 2,97175279 | 10 | 10 |
| lmo1423             | EGDe (NCBI) | complement(1454347..1455177) | 8,132088876 | 831  | 8,13208888 | 10 | 10 |
| era                 | EGDe (NCBI) | complement(1495899..1496804) | 7,45890271  | 906  | 7,45890271 | 10 | 10 |
| citC                | EGDe (NCBI) | complement(1604613..1605875) | 5,35056679  | 1263 | 5,35056679 | 10 | 10 |
| ackA                | EGDe (NCBI) | complement(1623099..1624292) | 5,659770398 | 1194 | 5,6597704  | 10 | 10 |
| lmo1678             | EGDe (NCBI) | complement(1732926..1734779) | 3,644965402 | 1854 | 3,6449654  | 10 | 10 |
| glmM                | EGDe (NCBI) | complement(2197763..2199115) | 4,994653256 | 1353 | 4,99465326 | 10 | 10 |
| lmo2199             | EGDe (NCBI) | complement(2288571..2288987) | 16,20567351 | 417  | 16,2056735 | 10 | 10 |
| lmo2202             | EGDe (NCBI) | complement(2290989..2291927) | 7,196768749 | 939  | 7,19676875 | 10 | 10 |
| lmo2230             | EGDe (NCBI) | 2320416..2320841             | 15,86330013 | 426  | 15,8633001 | 10 | 10 |
| lmo2341             | EGDe (NCBI) | complement(2409875..2410993) | 6,039111578 | 1119 | 6,03911158 | 10 | 10 |
| lmo2373             | EGDe (NCBI) | complement(2449878..2450192) | 21,45322494 | 315  | 21,4532249 | 10 | 10 |
| lmo2417             | EGDe (NCBI) | complement(2488379..2489209) | 8,132088876 | 831  | 8,13208888 | 10 | 10 |
| rplM                | EGDe (NCBI) | complement(2684665..2685102) | 15,42868917 | 438  | 15,4286892 | 10 | 10 |
| rplO                | EGDe (NCBI) | complement(2696771..2697211) | 15,3237321  | 441  | 15,3237321 | 10 | 10 |
| rplB                | EGDe (NCBI) | complement(2703275..2704108) | 8,102836757 | 834  | 8,10283676 | 10 | 10 |
| serS                | EGDe (NCBI) | complement(2821912..2823195) | 5,26305752  | 1284 | 5,26305752 | 10 | 10 |
| * Reads number ≥ 10 |             |                              |             |      |            |    |    |
